# Supplementary material for: Psychological effect of cervical cancer screening when changing primary screening method from cytology to high‐risk human papilloma virus testing
Source: PubMed Central journal article supplement — Int J Cancer. 2019 Jan 4;145(1):29–39. doi: 10.1002/ijc.32067 (PMC6590646; doi:10.1002/ijc.32067), 2019-01-04
Supplement: IJC-145-29-s001.pdf [file IJC-145-29-s001.pdf]

## Kvinnens erfaringer med screening mot livmorhalskreft

Det finnes ikke riktige eller gale svar. Forsøk å besvare hvert spørsmål så nøyaktig og ærlig som mulig. Det tar cirka 10 minutter å besvare spørreskjemaet.

Vennligst svar ved å krysse av  for de/det mest passende svaret.

Vi håper du vil besvare alle spørsmålene, også de av personlig karakter. Vi ønsker svar fra deg om du har tatt livmorhalsprøve eller ikke. Dine svar er viktige i arbeidet med å forebygge livmorhalskreft.

### BAKGRUNN

1. Hvilket år ble du født? 19

2. Hva er din sivilstatus i dag?

- Gift/samboer/partnerskap  
 Har kjæreste, men vi bor ikke sammen  
 Singel  
 Skilt/separert  
 Enke

3. Hvor mange års skolegang har du fullført (inkludert teoretiske studier og yrkesutdanning; rund av til nærmeste hele år)?

- Mindre enn 10 år  
 11-13 år  
 14-17 år  
 Mer enn 17 år

4. Hvor er du født?

- Norge  
 Europa (unntatt Norge)  
 Afrika  
 Amerika  
 Asia  
 Oseania

5. Hvor mange år har du bodd i Norge (rund av til nærmeste hele år)?

- 0 - 1 år  
 2-5 år  
 6-10 år  
 11-20 år  
 21 år eller mer  
 Hele livet

**HELSE**

6. Stort sett, vil du si at din fysiske helse er:

- Utmerket  
 Meget god  
 God  
 Nokså god  
 Dårlig

7. I løpet av de siste to ukene, hvor ofte har du vært plaget av de følgende problemene? (For hver rad, sett ett kryss i den ruta som passer best)

|                                                          | Ikke i<br>det hele<br>tatt | Noen<br>dager            | Mer enn<br>halvparten<br>av dagene | Nesten<br>hver<br>dag    |
|----------------------------------------------------------|----------------------------|--------------------------|------------------------------------|--------------------------|
| Følt deg nervøs, engstelig eller på tuppet.....          | <input type="checkbox"/>   | <input type="checkbox"/> | <input type="checkbox"/>           | <input type="checkbox"/> |
| Ikke klart å stoppe eller kontrollere bekymringene dine. | <input type="checkbox"/>   | <input type="checkbox"/> | <input type="checkbox"/>           | <input type="checkbox"/> |
| Følt deg nedfor, deprimert eller fylt av håpløshet.....  | <input type="checkbox"/>   | <input type="checkbox"/> | <input type="checkbox"/>           | <input type="checkbox"/> |
| Følt liten interesse eller glede av å gjøre ting.....    | <input type="checkbox"/>   | <input type="checkbox"/> | <input type="checkbox"/>           | <input type="checkbox"/> |

**SCREENING MOT LIVMORHALSKREFT**

8. Før du leste vedlagte informasjon, visste du da at en livmorhalsprøve kan avdekke celleforandringer som ubehandlet kan føre til livmorhalskreft?

- Ja  
 Nei  
 Vet ikke

9. Hvis du svarte «ja» på det forrige spørsmålet, kan du huske hvor du fikk denne kunnskapen fra? (Det er mulig å sette flere kryss)

- Påminnelsesbrev fra Kreftregisteret  
 Fastlegen  
 Gynekologen  
 Annet helsepersonell  
 Internett  
 Media  
 Familie/venner  
 Helsestasjon  
 Annet, spesifiser   
 Husker ikke

10. Har du noen gang mottatt brev fra Kreftregisteret med påminnelse om å ta livmorhalsprøve?

- Ja  
 Nei  
 Vet ikke

11. Hvis du svarte «ja» på det forrige spørsmålet, hvordan reagerte du på dette brevet? (For hver rad, sett kryss i den ruta som passer best)

|                                                   | Stemmer                  | Stemmer                  | Stemmer                  | Stemmer                  |
|---------------------------------------------------|--------------------------|--------------------------|--------------------------|--------------------------|
|                                                   | Ikke                     | litt                     | ganske godt              | helt                     |
| Jeg leste brevet.....                             | <input type="checkbox"/> | <input type="checkbox"/> | <input type="checkbox"/> | <input type="checkbox"/> |
| Jeg forstod brevet.....                           | <input type="checkbox"/> | <input type="checkbox"/> | <input type="checkbox"/> | <input type="checkbox"/> |
| Jeg bestilte time for celleprøvetakning.....      | <input type="checkbox"/> | <input type="checkbox"/> | <input type="checkbox"/> | <input type="checkbox"/> |
| Brevet irriterte meg.....                         | <input type="checkbox"/> | <input type="checkbox"/> | <input type="checkbox"/> | <input type="checkbox"/> |
| Jeg ble bekymret.....                             | <input type="checkbox"/> | <input type="checkbox"/> | <input type="checkbox"/> | <input type="checkbox"/> |
| Jeg følte at noen «passer på» meg (positivt)..... | <input type="checkbox"/> | <input type="checkbox"/> | <input type="checkbox"/> | <input type="checkbox"/> |
| Jeg følte meg overvåket (negativt).....           | <input type="checkbox"/> | <input type="checkbox"/> | <input type="checkbox"/> | <input type="checkbox"/> |
| Jeg reagerte ikke i det hele tatt.....            | <input type="checkbox"/> | <input type="checkbox"/> | <input type="checkbox"/> | <input type="checkbox"/> |
| Jeg husker ikke.....                              | <input type="checkbox"/> | <input type="checkbox"/> | <input type="checkbox"/> | <input type="checkbox"/> |

12. Hvor ofte pleier du å ta livmorhalsprøve?

- Oftere enn hvert tredje år  
 Sjeldnere enn hvert tredje år  
 Når jeg får påminnelsesbrev  
 Jeg pleier ikke å ta livmorhalsprøve

13. Livmorhalsprogrammet vil øke anbefalt tidsintervall mellom hver livmorhalsprøve til hvert femte år. Hvordan vil du forholde deg til dette?

- Jeg kommer til å ta livmorhalsprøve oftere enn hvert femte år  
 Jeg kommer til å ta livmorhalsprøve sjeldnere enn hvert femte år  
 Jeg kommer til å ta livmorhalsprøve når jeg får påminnelsesbrev  
 Jeg kommer ikke til å ta livmorhalsprøve  
 Jeg vet ikke

14. Hva er det som påvirker når du pleier å ta livmorhalsprøve? (Det er mulig å sette flere kryss)

- Påminnelsesbrevet jeg får fra livmorhalsprogrammet får meg til å ta en livmorhalsprøve  
 Legen min minner meg på det  
 Jeg tar livmorhalsprøve på eget initiativ  
 Etter å ha lest om det, hørt om det og/eller snakket med venner om det, tar jeg livmorhalsprøve  
 Annet, spesifiser

15. Hvordan opplever du tiden fra du tar en livmorhalsprøve til du får resultatet?

- Jeg tenker ikke på hva resultatet av livmorhalsprøven vil bli  
 Jeg tenker på hva resultatet av livmorhalsprøven vil bli, men det bekymrer meg ikke  
 Jeg bekymrer meg over hva resultatet av livmorhalsprøven vil bli  
 Jeg har aldri tatt livmorhalsprøve  
 Jeg vet ikke

16. Hva var resultatet av din siste livmorhalsprøve?

- Normalt  
 Unormalt  
 Vet ikke  
 Jeg forstod ikke resultatet

17. Dersom din siste livmorhalsprøve var unormal, hvordan opplevde du dette? (For hver rad, sett kryss i den ruta som passer best)

|                                                                                                  | Stemmer                  |                          |                           |                          |                          |
|--------------------------------------------------------------------------------------------------|--------------------------|--------------------------|---------------------------|--------------------------|--------------------------|
|                                                                                                  | Ikke                     | Stemmer<br>litt          | Stemmer<br>ganske<br>godt | Stemmer<br>helt          | Ikke<br>aktuelt          |
| Jeg fikk god informasjon om videre oppfølging...                                                 | <input type="checkbox"/> | <input type="checkbox"/> | <input type="checkbox"/>  | <input type="checkbox"/> | <input type="checkbox"/> |
| Jeg ble bekymret for min fremtidige helse.....                                                   | <input type="checkbox"/> | <input type="checkbox"/> | <input type="checkbox"/>  | <input type="checkbox"/> | <input type="checkbox"/> |
| Jeg snakket om prøveresultatet med min partner                                                   | <input type="checkbox"/> | <input type="checkbox"/> | <input type="checkbox"/>  | <input type="checkbox"/> | <input type="checkbox"/> |
| Jeg snakket om prøveresultatet med mine nære<br>venner.....                                      | <input type="checkbox"/> | <input type="checkbox"/> | <input type="checkbox"/>  | <input type="checkbox"/> | <input type="checkbox"/> |
| Det følte vanskelig å informere partneren<br>min om prøveresultatet .....                        | <input type="checkbox"/> | <input type="checkbox"/> | <input type="checkbox"/>  | <input type="checkbox"/> | <input type="checkbox"/> |
| Jeg lurte på hvordan <u>jeg</u> kunne få et<br>unormalt prøveresultat.....                       | <input type="checkbox"/> | <input type="checkbox"/> | <input type="checkbox"/>  | <input type="checkbox"/> | <input type="checkbox"/> |
| Det påvirket parforholdet mitt i negativ<br>retning.....                                         | <input type="checkbox"/> | <input type="checkbox"/> | <input type="checkbox"/>  | <input type="checkbox"/> | <input type="checkbox"/> |
| Det påvirket seksuallivet mitt i negativ<br>retning.....                                         | <input type="checkbox"/> | <input type="checkbox"/> | <input type="checkbox"/>  | <input type="checkbox"/> | <input type="checkbox"/> |
| Det var vanskelig å forstå hvilken innvirkning<br>resultatet burde få for seksuallivet mitt..... | <input type="checkbox"/> | <input type="checkbox"/> | <input type="checkbox"/>  | <input type="checkbox"/> | <input type="checkbox"/> |

18. Hvilken metode ble din siste livmorhalsprøve testet med?

- Cytologisk celleanalyse  
 HPV-test  
 Både med cytologisk celleanalyse og HPV-test  
 Vet ikke

19. Før du leste om humant papillomavirus (HPV) i vedlagte informasjon, hadde du noen gang hørt at HPV kan forårsake kreft?

- Ja  
 Nei  
 Vet ikke

**Du er nå ferdig med spørreskjemaet. Takk for dine svar! Vennligst returner det utfylte skjemaet ved å legge det i vedlagte ferdigutfylte og frankerte svarkonvolutt**
